# Supplementary material
Source: MDPI journal article supplement (https://www.mdpi.com/2313-576X/10/4/92)
Supplement: s1 [file s1]

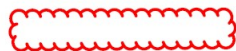

Work area of the construction workers
